# Supplementary material
Source: MDPI journal article supplement (https://www.mdpi.com/1424-2818/11/5/69)
Supplement: s1 [file s1]

## Supplementary materials

(A) HST09-GYM

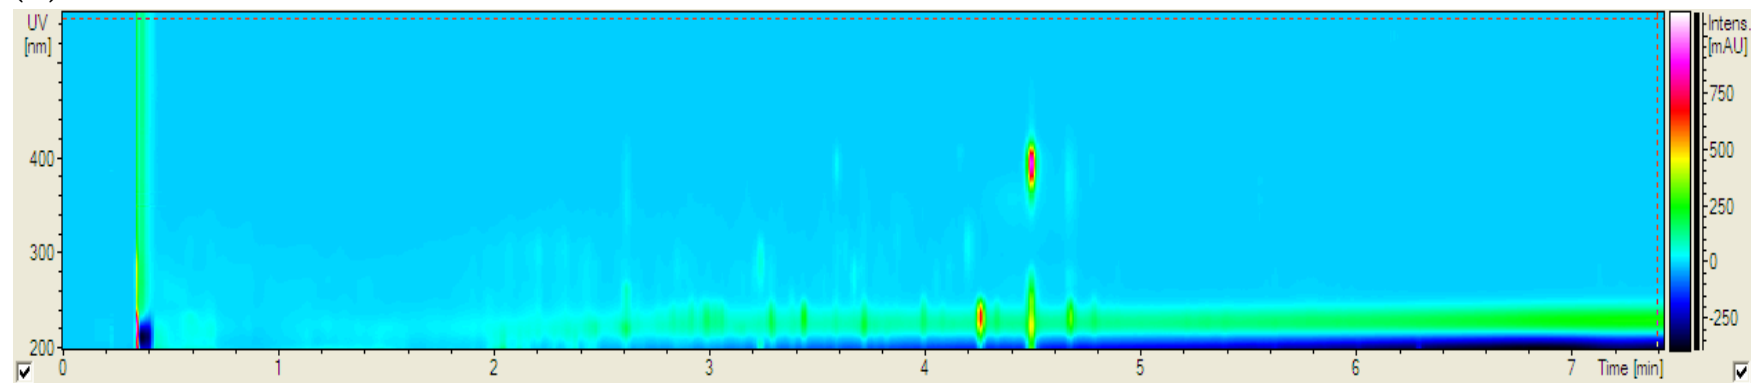

(B) HST09-SPM

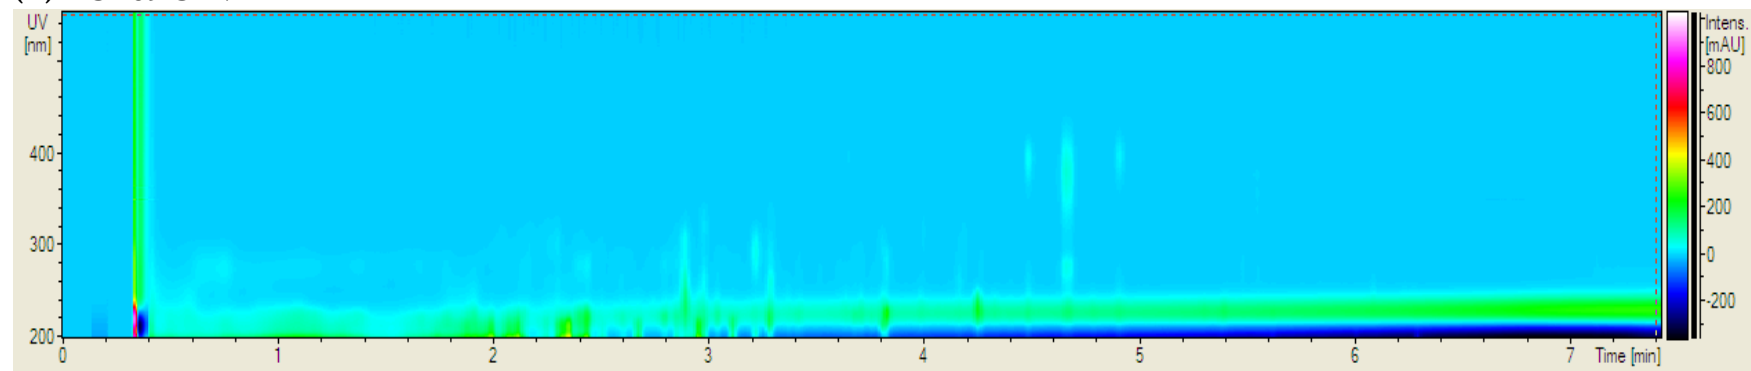

(A) HST14-GYM

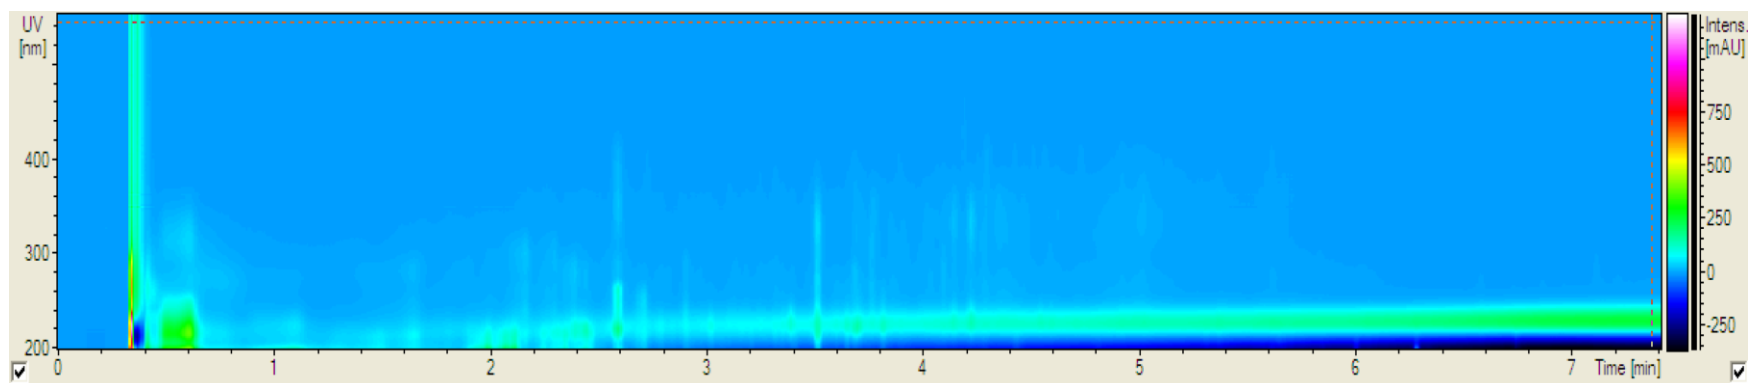

**(B) HST14-SPM**

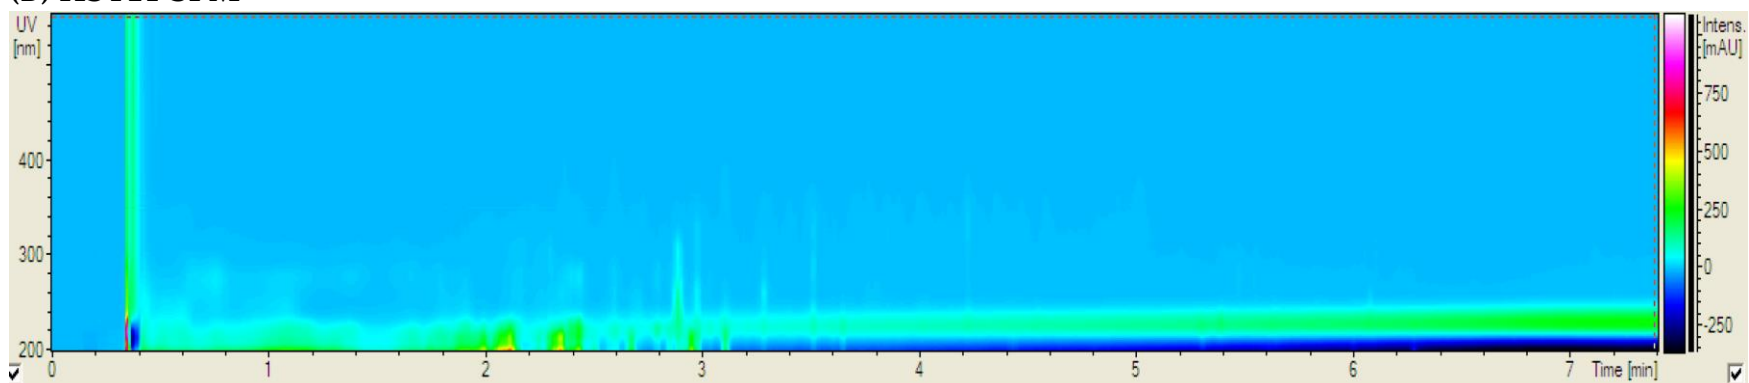

**(A) HST19-GYM**

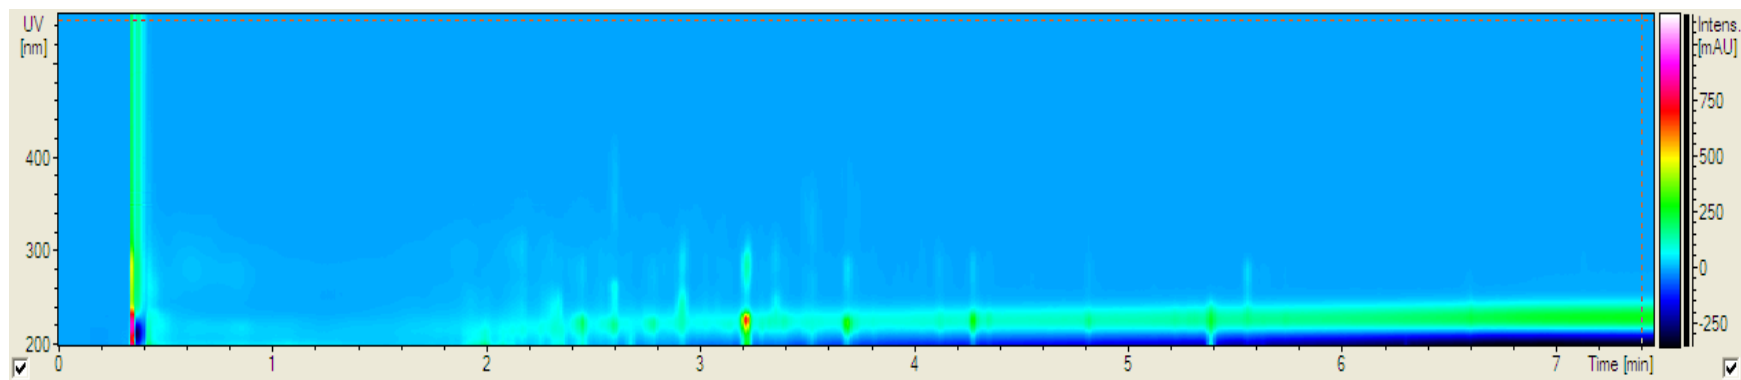

**(B) HST19-SPM**

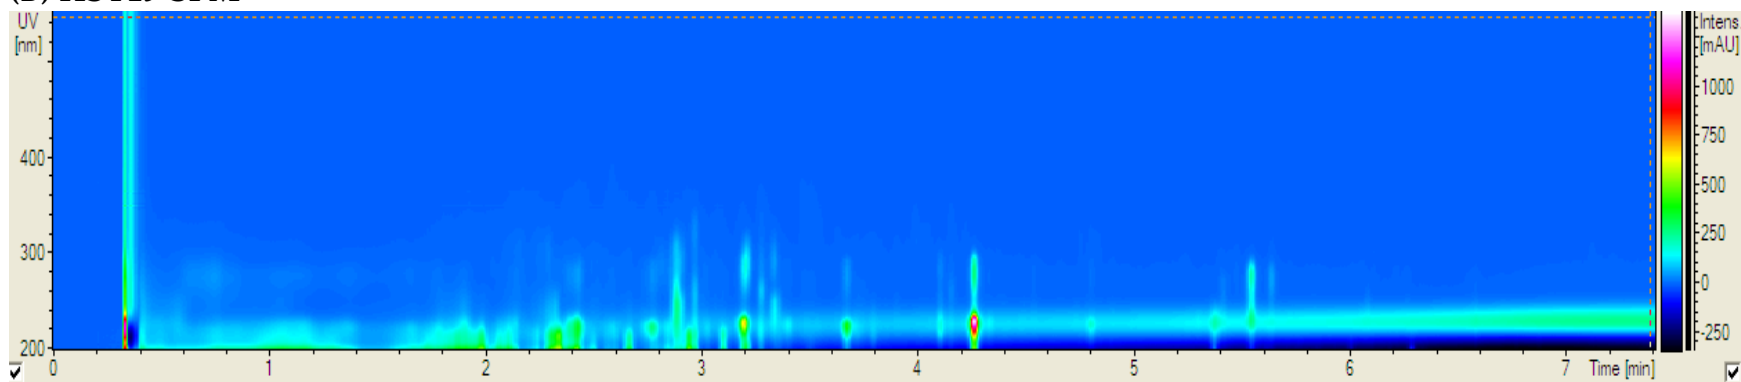

**(A) HST21-GYM**

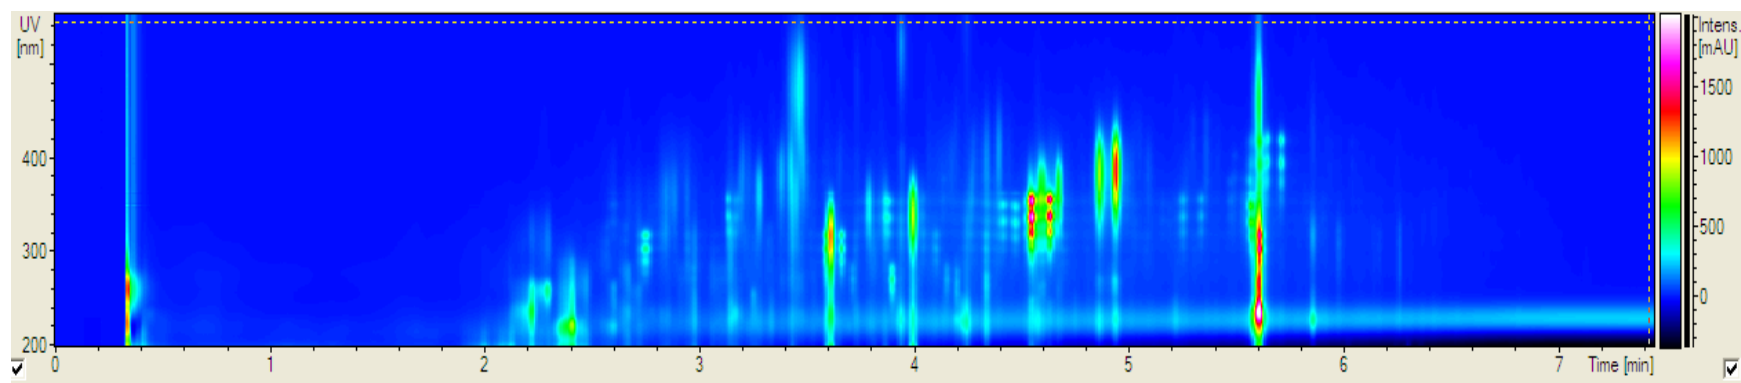

**(B) HST21-SPM**

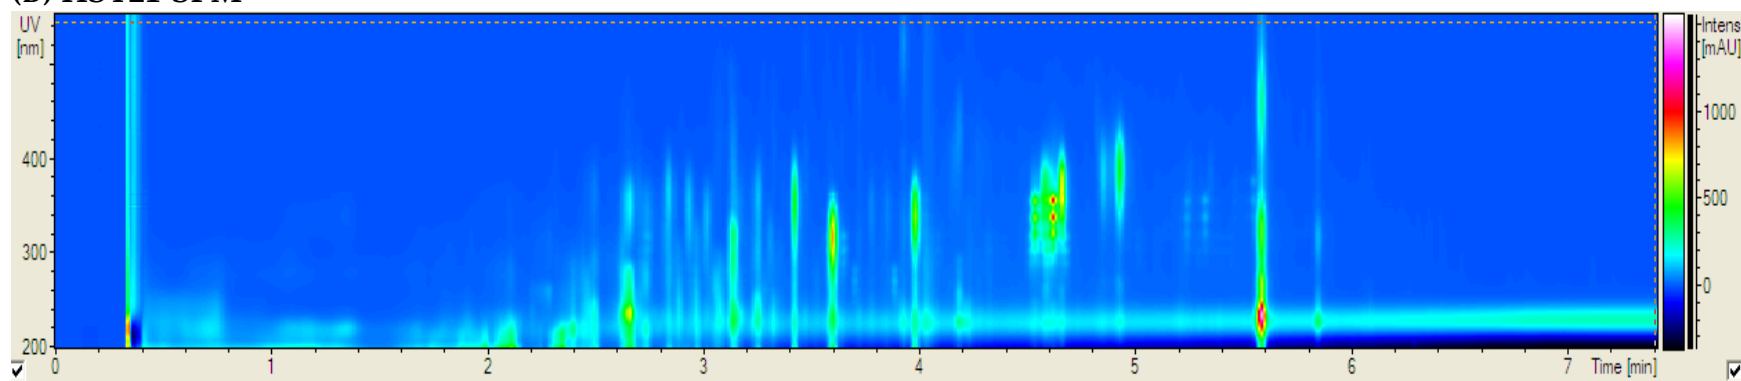

**(A) HST23-GYM**

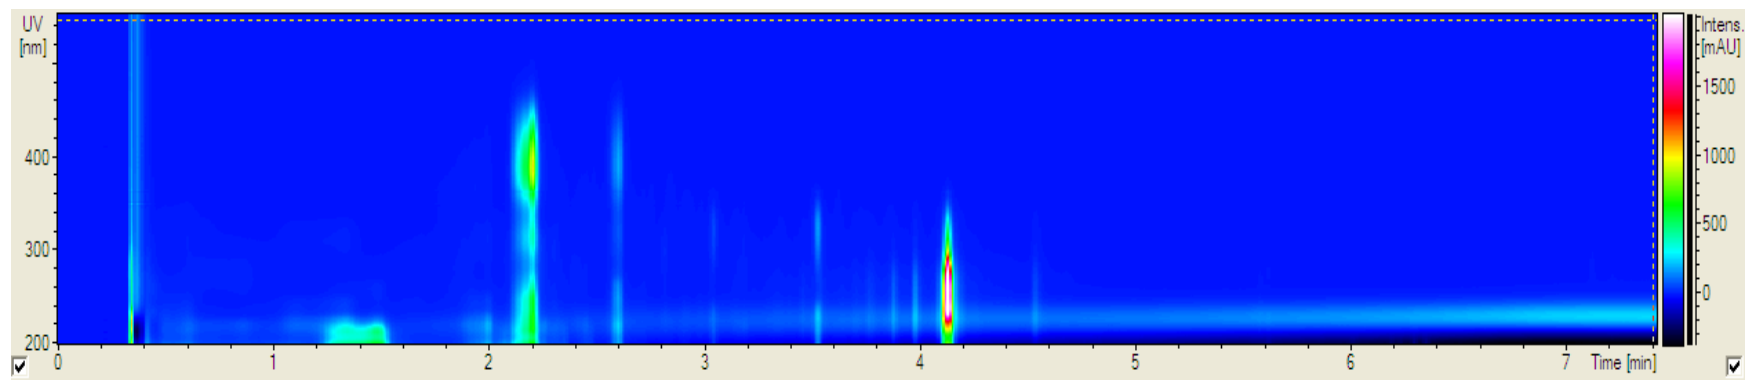

**(B) HST23-SPM**

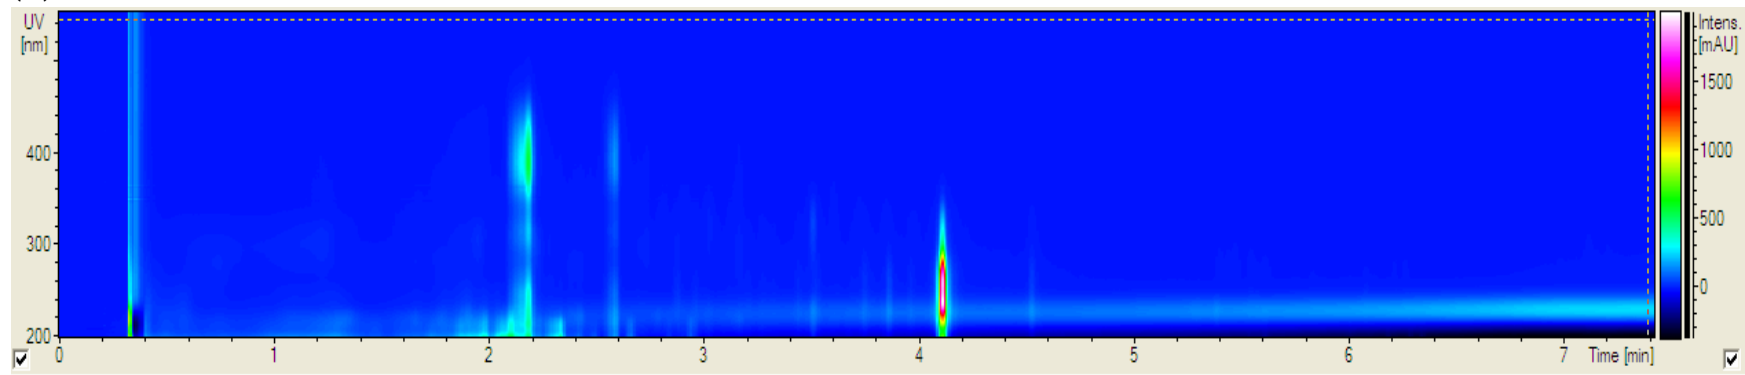

**(A) HST28-GYM**

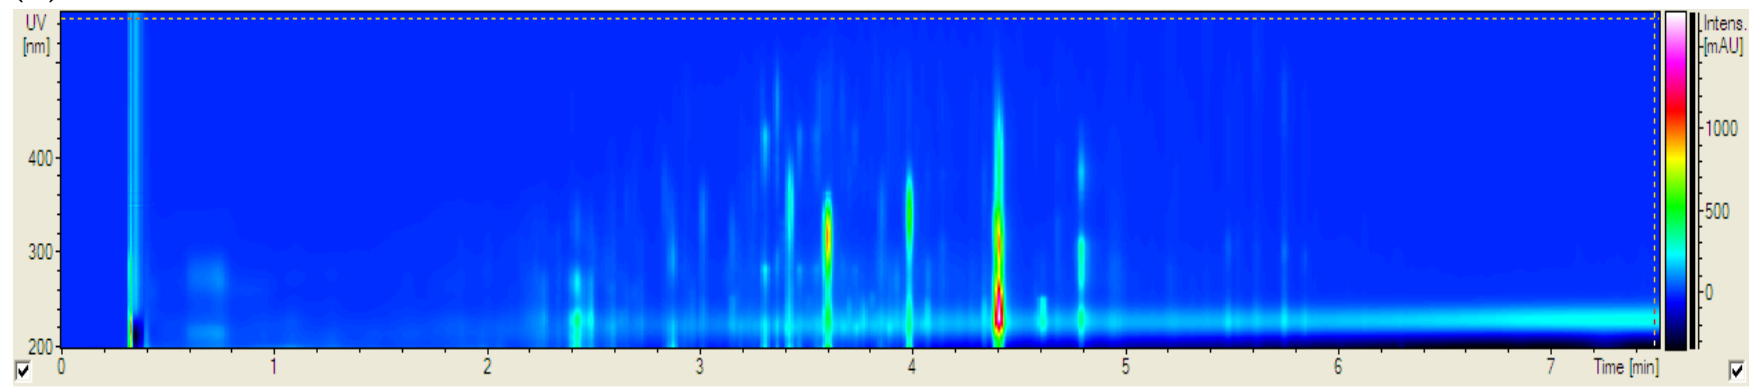

**(B) HST28-SPM**

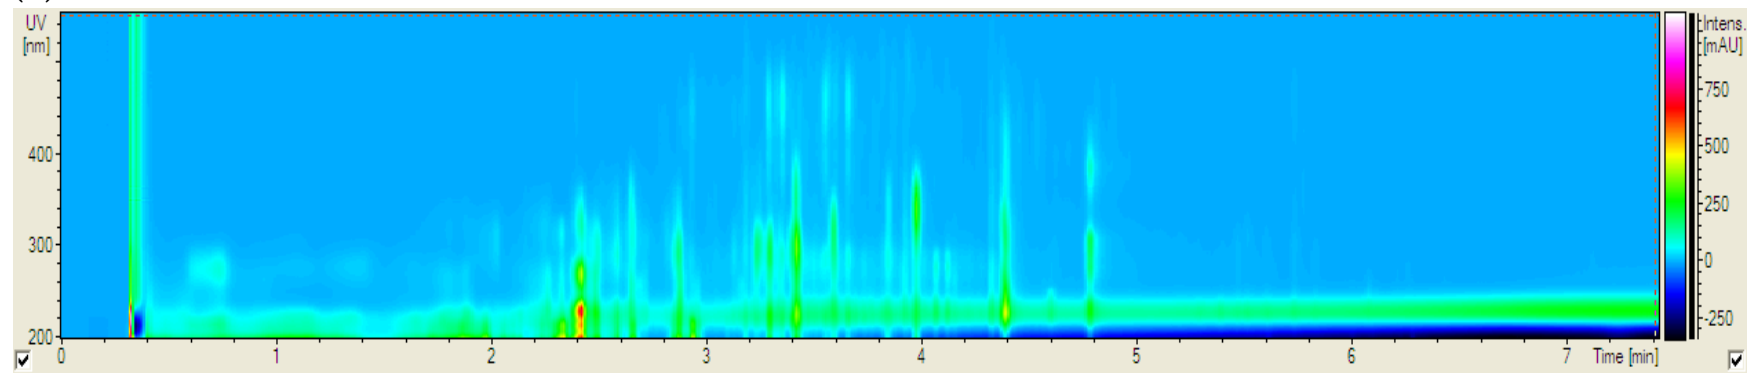

**(A) HST50-GYM**

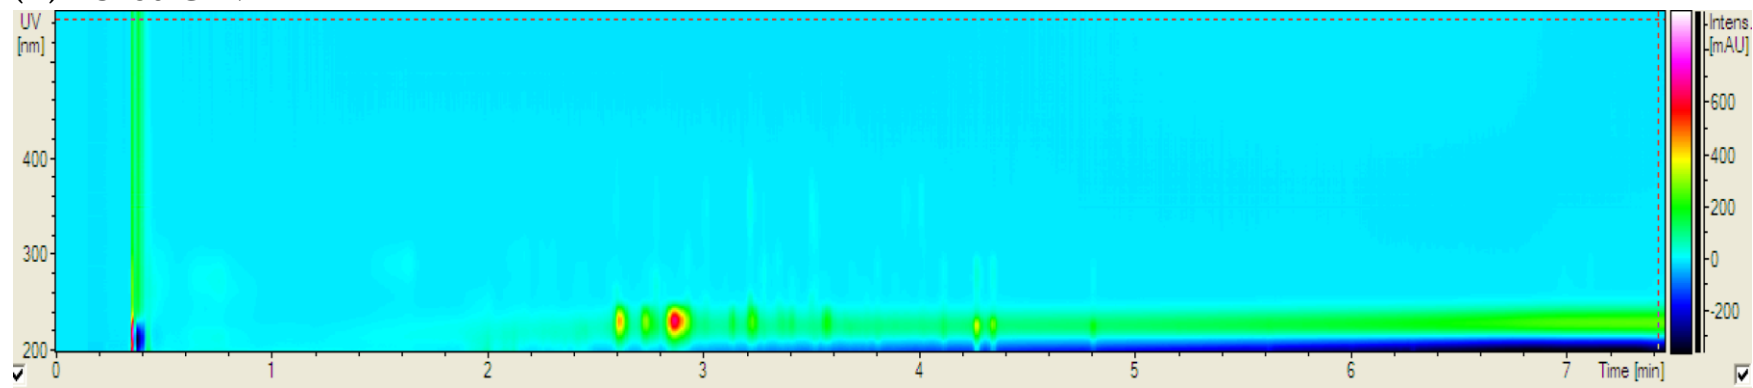

**(B) HST50-SPM**

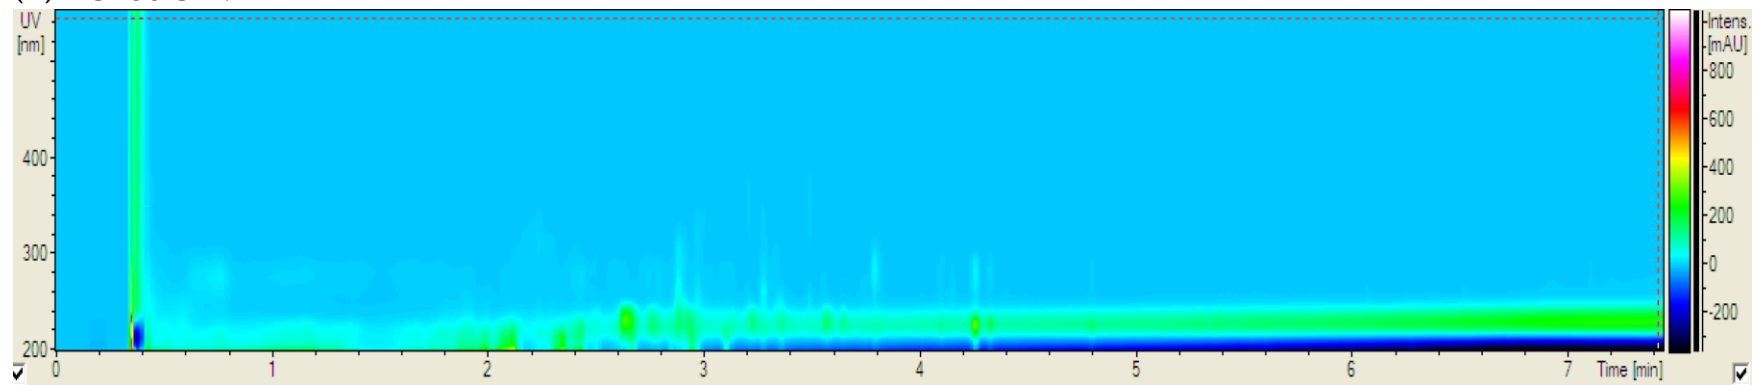

**(A) HST54-GYM**

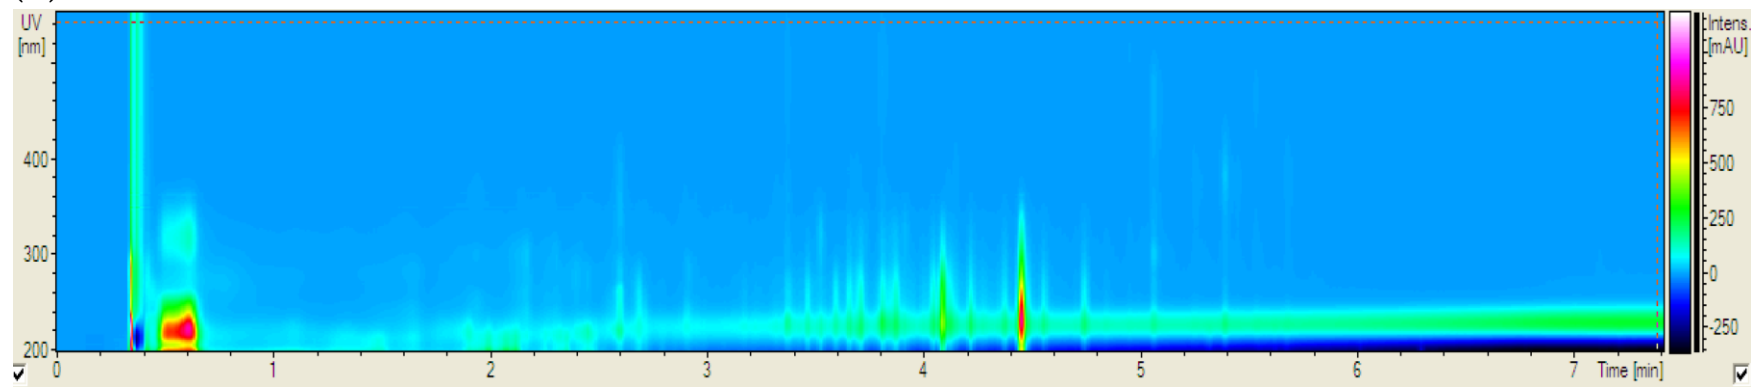

**(B) HST54-SPM**

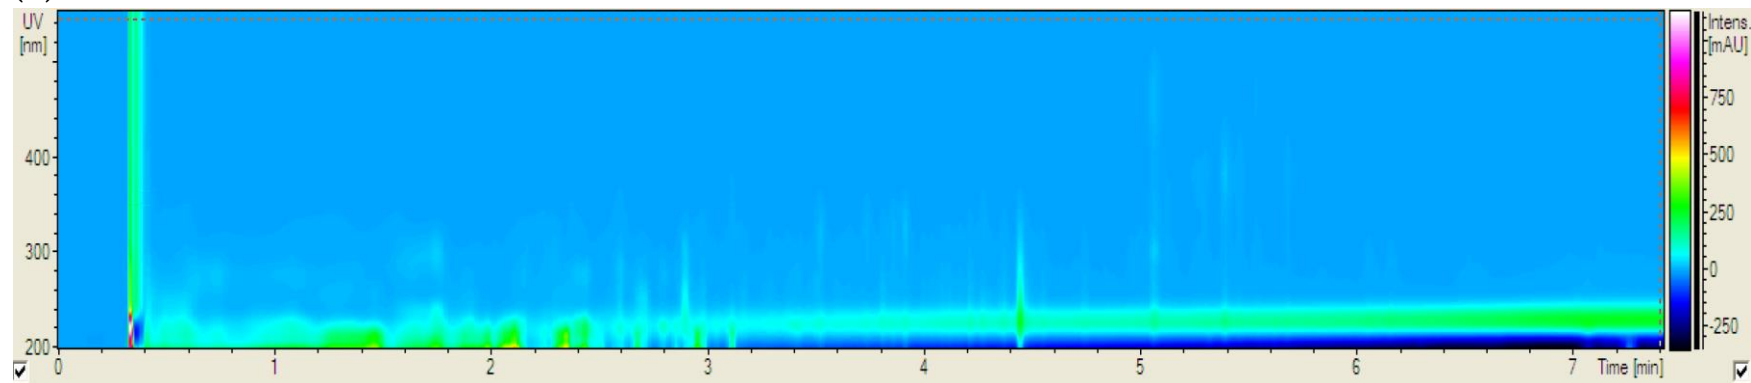

**(A) HST61-GYM**



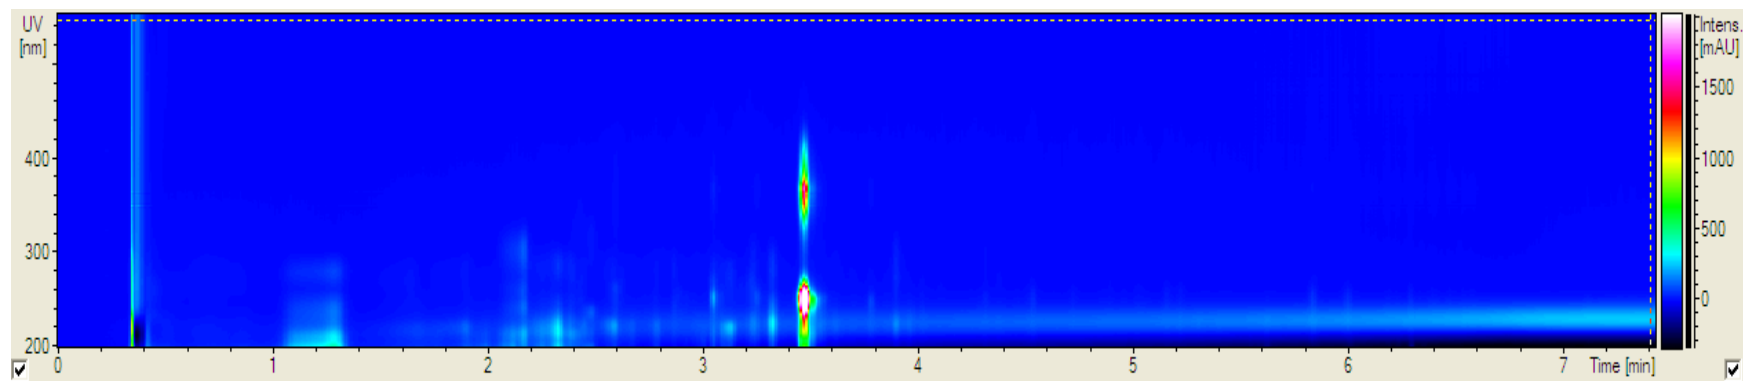

**(B) HST61-SPM**

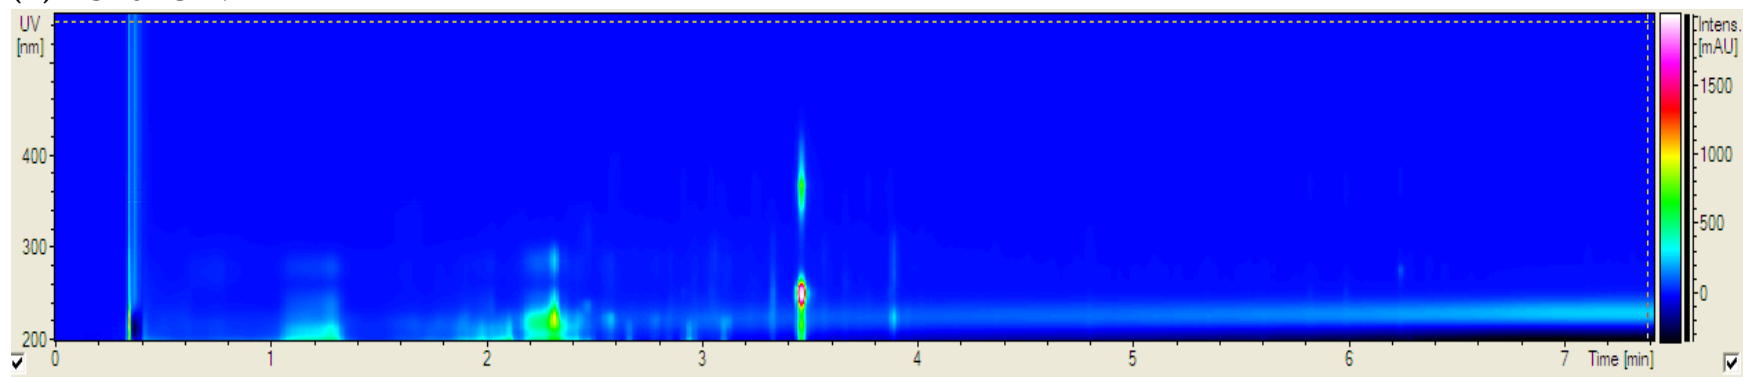

**(A) HST68-GYM**

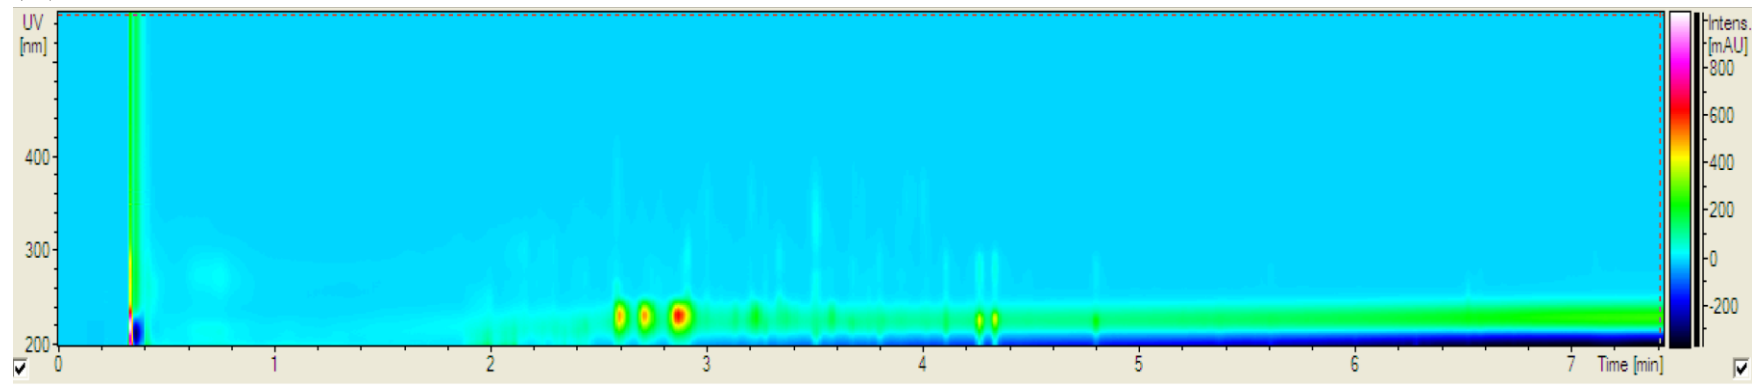

**(B) HST68-SPM**

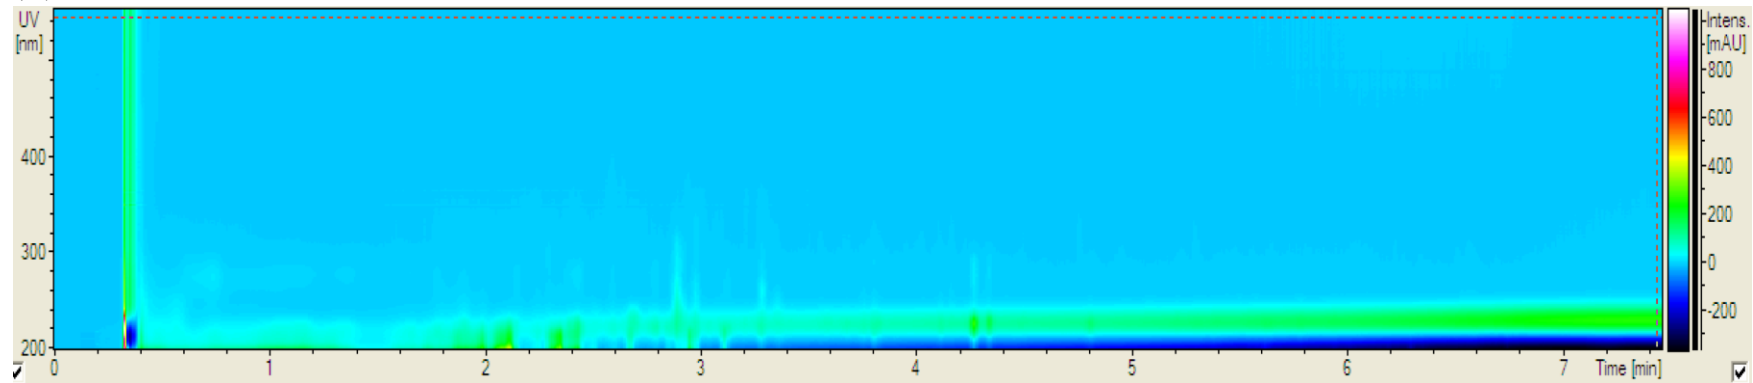

**(A) HST72-GYM**

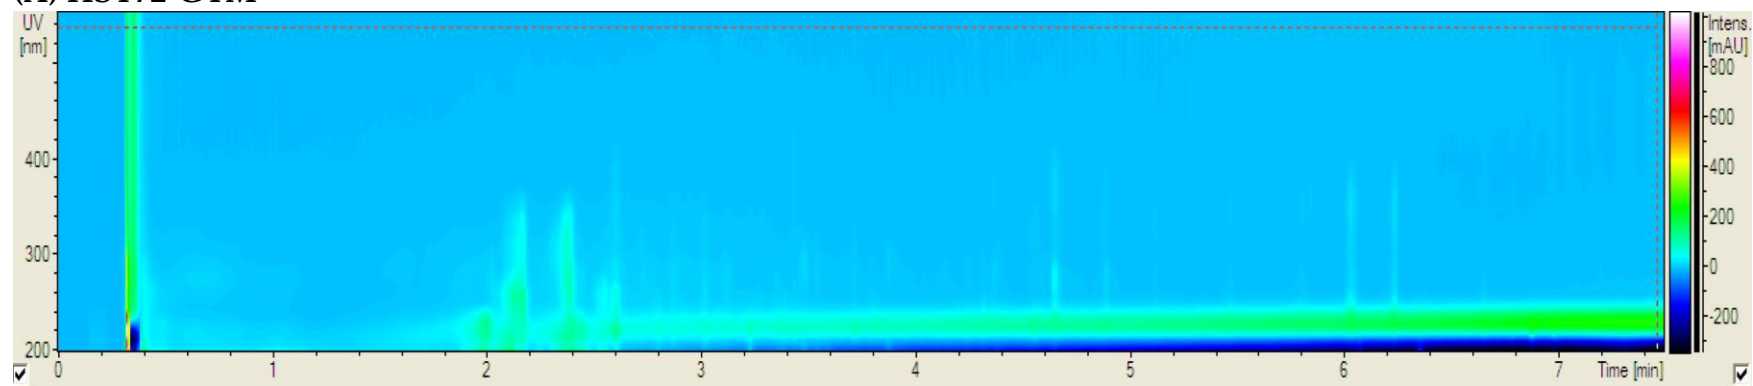

**(B) HST72-SPM**

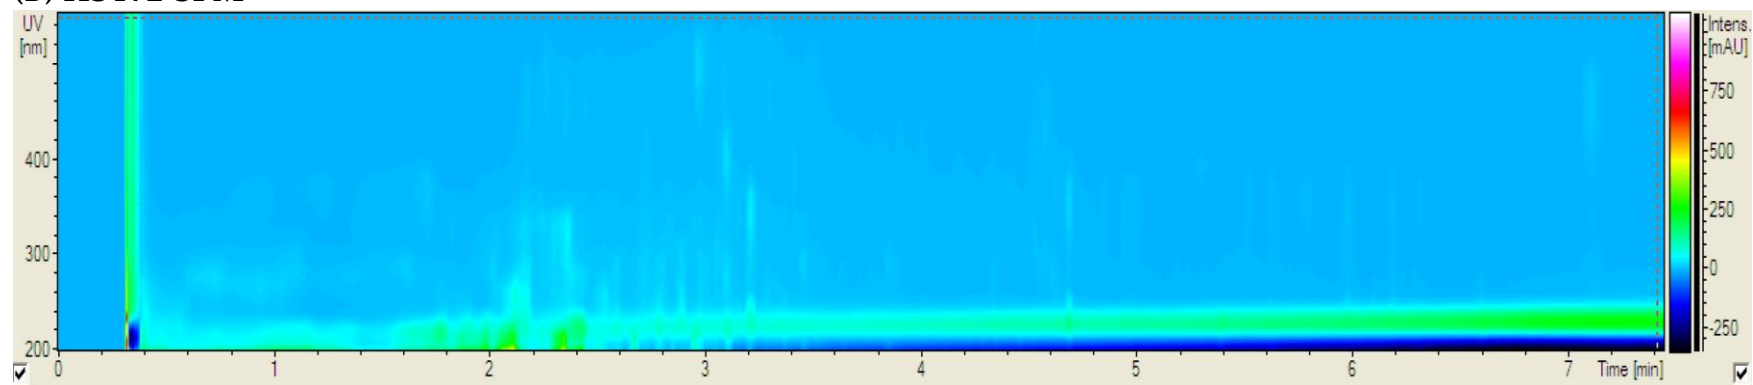

### (A) HST82-GYM

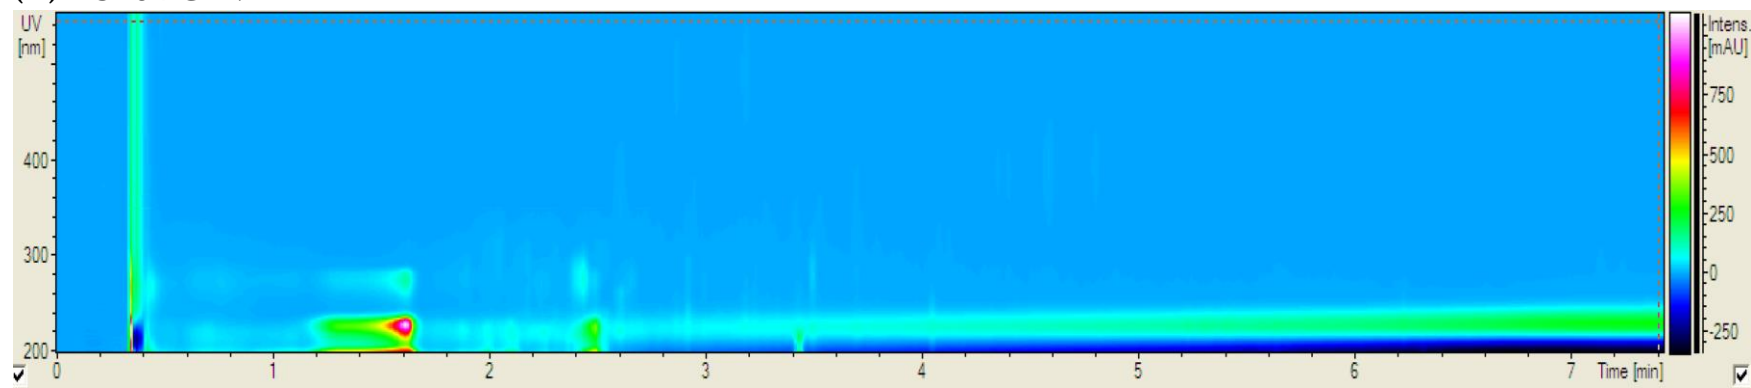

### (B) HST82-SPM

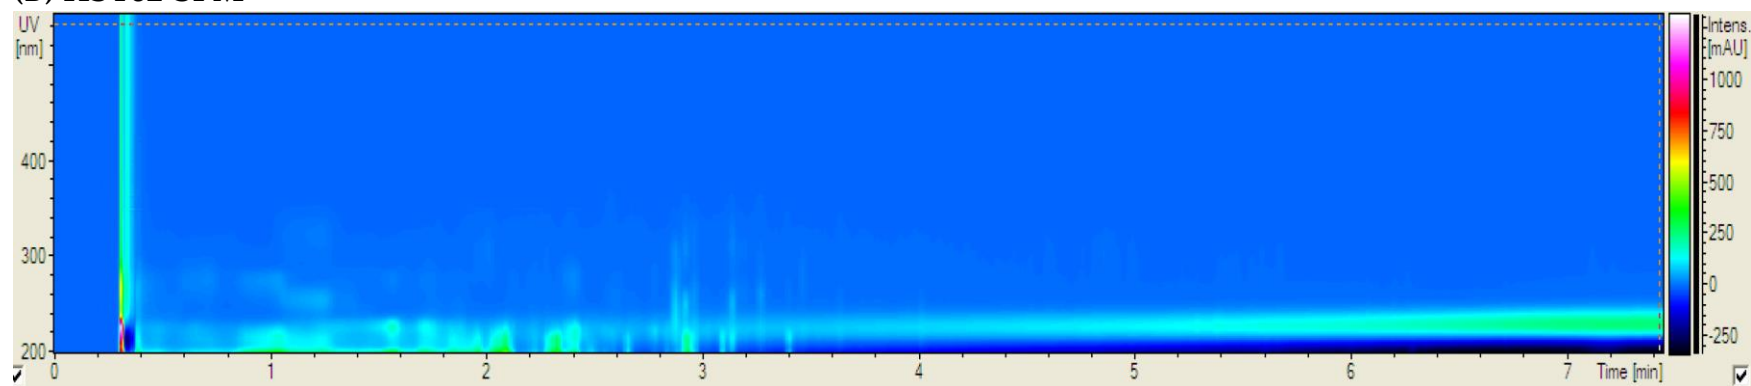

**Figure S1.** HPLC-UV/Vis Chromatographic profiles of extracts obtained from culture metabolic extracts for analyzed strains, which were grown in liquid media GYM4 (A) and SPM (B) both of them at 2% NaCl. To the left of the graphics it is the absorbance (nm) within UV spectrum, to the right, the intensity of the elution peaks (mAU), and at the bottom, the elution time.
